# Supplementary material
Source: HighWire-hosted journal article supplement (http://d2538ggaoe6cji.cloudfront.net/highwire/filestream/44999/field_highwire_adjunct_files/0/131326-1.pdf)
Supplement: 131326-1.pdf [file 131326-1.pdf]

## Supplemental Information

|     | Gene name                                                           | Allele name             | Phenotype                                 | Recessivity | Penetrance          | Molecular Lesion | Reference                  |
|-----|---------------------------------------------------------------------|-------------------------|-------------------------------------------|-------------|---------------------|------------------|----------------------------|
| i   | Mutations resulting in the absence of TRN maker                     |                         |                                           |             |                     |                  |                            |
|     | <i>lin-32</i>                                                       | <i>u909</i>             | Lack of PLM, AVM, and PVM labeling        | recessive   | 58%                 |                  | Mitani et al., 1993        |
|     | <i>cdk-4</i>                                                        | <i>u948</i>             | Lack of PLM, AVM, and PVM labeling        | recessive   | 88%                 | Q18*             |                            |
|     | <i>mec-4</i>                                                        | <i>u947; u972</i>       | Degeneration of TRNs                      | recessive   | 35% ( <i>u947</i> ) | A513T            |                            |
|     |                                                                     | <i>u951</i>             | Degeneration of TRNs                      | dominant    | 65%                 | A713T            | Driscoll and Chalfie, 1991 |
|     | <i>mec-10</i>                                                       | <i>u1025</i>            | Degeneration of TRNs                      | recessive   | 10%                 | G312R            |                            |
| ii  | Mutations resulting in the expression of TRN markers in extra cells |                         |                                           |             |                     |                  |                            |
|     | <i>egl-46</i>                                                       | <i>u945</i>             | Expression of TRN marker in FLPs          | recessive   | 65%                 |                  | Wu et al., 2001            |
|     | <i>egl-44</i>                                                       | <i>u965</i>             | Expression of TRN marker in FLPs          | recessive   | 79%                 |                  | Wu et al., 2001            |
|     | <i>pag-3</i>                                                        | <i>u920; u949; u961</i> | Expression of TRN marker in BDUs          | recessive   | 90% ( <i>u920</i> ) |                  | Jia et al., 1996           |
|     | <i>egl-13</i>                                                       | <i>u964</i>             | Expression of TRN marker in A/PQRs        | recessive   | 68%                 | H389Y            | Feng et al., 2013          |
| iii | Mutations resulting in developmental defects in AVM/PVM             |                         |                                           |             |                     |                  |                            |
|     | <i>egl-20</i>                                                       | <i>u999</i>             | PVM is mispositioned anteriorly           | recessive   | 82%                 | V92D             | Harris et al., 1996        |
|     | <i>unc-6</i>                                                        | <i>u1018</i>            | Ventral guidance defects for AVM neurites | recessive   | 61%                 | C346Y            | Hedgecock et al., 1990     |

Table S1. Mutations that affect the expression pattern of TRN marker or the development of the postembryonic AVM and PVM cells. References indicate that similar mutant phenotypes for the gene were previously reported. *cdk-4* was not previously known to affect TRN development. Although they each have the same underlying defect, *u947* and *u972* were independently isolated. These two alleles and *mec-10(u1025)* identify novel changes that cause TRN degeneration.

|   | Gene name                                                 | Allele name                   | Recessivity | Penetrance             | Molecular Lesion | Reference                                        |
|---|-----------------------------------------------------------|-------------------------------|-------------|------------------------|------------------|--------------------------------------------------|
| A | Mutations that shorten all TRN neurites                   |                               |             |                        |                  |                                                  |
|   | <i>mec-7</i>                                              | <i>u910</i>                   | dominant    | 100%                   | P356L            |                                                  |
|   |                                                           | <i>u911</i>                   | dominant    |                        | P171S            |                                                  |
|   |                                                           | <i>u955</i>                   | dominant    |                        | A352T            |                                                  |
|   |                                                           | <i>u956</i>                   | dominant    |                        | P358L            |                                                  |
|   |                                                           | <i>u957</i>                   | dominant    |                        | P171L            |                                                  |
|   |                                                           | <i>u958</i>                   | dominant    |                        | G244S            |                                                  |
|   | <i>unc-51</i>                                             | <i>u1000</i>                  | recessive   | 80%                    | E188K            | Du and Chalfie, 2001                             |
| B | Mutations that shorten the PLM-PN                         |                               |             |                        |                  |                                                  |
|   | <i>mec-7</i>                                              | <i>u1020</i>                  | recessive   |                        | G34S             |                                                  |
|   | <i>mec-12</i>                                             | <i>u1019</i>                  | dominant    |                        | G354E            |                                                  |
|   |                                                           | <i>u950</i>                   | recessive   |                        | S140F            |                                                  |
|   |                                                           | <i>u1016</i>                  | recessive   |                        | E97K             |                                                  |
|   |                                                           | <i>u1021</i>                  | recessive   |                        | G144S            |                                                  |
|   | <i>dsh-1</i>                                              | <i>u915</i>                   | recessive   | 95%                    | R165Stop         | Zheng et al., 2015a                              |
|   |                                                           | <i>u952</i>                   | recessive   |                        | G512R            |                                                  |
|   |                                                           | <i>u953</i>                   | recessive   |                        | R103Stop         |                                                  |
|   | <i>tiam-1</i>                                             | <i>u914</i>                   | recessive   | 98%                    | R570Stop         | Zheng et al., 2016                               |
|   |                                                           | <i>u1003</i>                  | recessive   |                        |                  |                                                  |
|   |                                                           | <i>u1004</i>                  | recessive   |                        | R420Stop         |                                                  |
|   |                                                           | <i>u1005</i>                  | recessive   |                        | Q846Stop         |                                                  |
|   | <i>egl-5</i>                                              | <i>u918; u966</i>             | recessive   | 100%                   |                  | Zheng et al., 2015b                              |
|   | <i>mua-3</i>                                              | <i>u973</i>                   | recessive   | 45%                    | C2191Y           |                                                  |
|   | <i>sup-26</i>                                             | <i>u916</i>                   | recessive   | 81%                    | G95Stop          |                                                  |
| C | Mutations that result in an ectopic ALM-PN                |                               |             |                        |                  |                                                  |
|   | <i>mec-12</i>                                             | <i>u917</i>                   | recessive   | 38%                    | V260I            |                                                  |
|   | <i>mec-7</i>                                              | <i>u1017</i>                  | recessive   | 83%                    | L377F            |                                                  |
|   | <i>tba-7</i>                                              | <i>u1015</i>                  | recessive   | 79%                    | G92D             |                                                  |
| D | Mutations that shorten PLM-AN and elongate PLM-PN         |                               |             |                        |                  |                                                  |
|   | <i>lin-44</i>                                             | <i>u905; u906; u907; u959</i> | recessive   | 90%<br>( <i>u905</i> ) |                  | Hilliard and Bargmann, 2006; Zheng et al., 2015a |
|   |                                                           |                               | recessive   | 75%<br>( <i>u919</i> ) |                  |                                                  |
|   | <i>lin-17</i>                                             | <i>u919; u960; u962; u963</i> | recessive   |                        |                  | Hilliard and Bargmann, 2006; Zheng et al., 2015a |
| E | Mutations that shorten both PLM-AN and PLM-PN             |                               |             |                        |                  |                                                  |
|   | <i>mec-15</i>                                             | <i>u1008</i>                  | recessive   | 83%                    | Q194Stop         |                                                  |
| F | Mutations that shorten ALM-AN and PLM-AN                  |                               |             |                        |                  |                                                  |
|   | <i>unc-73</i>                                             | <i>u908</i>                   | recessive   | 85%                    | E1212K           | Du and Chalfie, 2001;<br>Zheng et al., 2016      |
|   |                                                           | <i>unc-53</i>                 | <i>u913</i> | recessive              | 90%              | Q261Stop                                         |
|   | <i>u912; u946; u967; u968;<br/>u969; u970; u971; u974</i> |                               | recessive   |                        |                  |                                                  |
|   | <i>klp-11</i>                                             | <i>u1024</i>                  | recessive   | 79%                    | Q53Stop          |                                                  |
| G | Mutations that shorten ALM-AN but not PLM-AN              |                               |             |                        |                  |                                                  |
|   | <i>unc-23</i>                                             | <i>u1022</i>                  | recessive   | 82%                    | Q132Stop         |                                                  |

Table S2 Mutations that cause neurite outgrowth or guidance defects in TRNs. References indicate that the similar mutant phenotypes for the gene were either previously reported or we extensively characterized the mutants elsewhere.

| <b>Gene</b>  | <b>Allele</b>   | <b>TRN morphology</b> |
|--------------|-----------------|-----------------------|
| <i>tba-1</i> | <i>ok1123</i>   | Normal                |
| <i>tba-1</i> | <i>ok1135</i>   | Normal                |
| <i>tba-1</i> | <i>or346</i>    | Normal                |
| <i>tba-1</i> | <i>or594</i>    | Normal                |
| <i>tba-2</i> | <i>sb51</i>     | Normal                |
| <i>tba-2</i> | <i>sb25</i>     | Normal                |
| <i>tba-5</i> | <i>tm4200</i>   | Normal                |
| <i>tba-7</i> | <i>gk787939</i> | Ectopic ALM-PN        |
| <i>tba-7</i> | <i>u1015</i>    | Ectopic ALM-PN        |
| <i>tba-8</i> | <i>tm4359</i>   | Normal                |
| <i>tba-9</i> | <i>ok1858</i>   | Normal                |
| <i>ben-1</i> | <i>e1880</i>    | Normal                |
| <i>tbb-1</i> | <i>gk207</i>    | Normal                |
| <i>tbb-2</i> | <i>t1623</i>    | Normal                |
| <i>tbb-2</i> | <i>gk130</i>    | Normal                |
| <i>tbb-4</i> | <i>sa127</i>    | Normal                |
| <i>tbb-4</i> | <i>ok1461</i>   | Normal                |
| <i>tbb-6</i> | <i>tm2004</i>   | Normal                |

Table S3. Loss-of-function alleles of  $\alpha$  and  $\beta$  tubulin genes (other than *mec-12* and *mec-7*) and their effects on TRN morphology.

| <b>Gene name</b> | <b>Mutation</b> | <b>Structural function</b> | <b>Corpus Callosum</b>    | <b>Reference</b>              |
|------------------|-----------------|----------------------------|---------------------------|-------------------------------|
| TUBA1A           | I5L             | Tubulin folding            | hypoplastic CC            | Jansen et al., 2011           |
|                  | E55K            | Lumen-facing loop          | partial ACC               | Morris-Rosendahl et al., 2008 |
|                  | T56M            | Lumen-facing loop          | complete ACC              | Bahi-Buisson et al., 2014     |
|                  | L70S            | GTP binding                | complete ACC              | Cushion et al., 2013          |
|                  | P72S            | Intradimer interaction     | hypoplastic CC            | Bahi-Buisson et al., 2014     |
|                  | L92V            | Lumen-facing loop          | complete ACC              | Kumar et al., 2010            |
|                  | N101S           | GTP binding                | complete ACC              | Bahi-Buisson et al., 2014     |
|                  | E113K           | Lateral interaction        | Normal                    | Bahi-Buisson et al., 2014     |
|                  | R123C           | Lateral interaction        | Normal                    | Bahi-Buisson et al., 2014     |
|                  | V137D           | Tubulin folding            | partial ACC               | Kumar et al., 2010            |
|                  | S158L           | Tubulin folding            | complete ACC              | Bahi-Buisson et al., 2014     |
|                  | Y161H           | Lateral interaction        | hypoplastic CC            | Poirier et al., 2013          |
|                  | I188L           | Tubulin folding            | partial ACC               | Poirier et al., 2007          |
|                  | Y210C           | Intradimer interaction     | hypoplastic CC            | Jansen et al., 2011           |
|                  | R214H           | Intradimer interaction     | complete ACC              | Bahi-Buisson et al., 2014     |
|                  | D218Y           | Intradimer interaction     | complete ACC              | Kumar et al., 2010            |
|                  | I219V           | Intradimer interaction     | partial ACC               | Oegema et al., 2015           |
|                  | V235L           | Tubulin folding            | hypoplastic CC            | Poirier et al., 2013          |
|                  | I238V           | Tubulin folding            | complete ACC              | Fallet-Bianco et al., 2008    |
|                  | D249H           | Longitudinal interaction   | complete ACC              | Poirier et al., 2007          |
|                  | P263T           | MAP binding                | complete ACC              | Fallet-Bianco et al., 2008    |
|                  | R264H           | MAP binding                | complete ACC              | Bahi-Buisson et al., 2014     |
|                  | R264C           | MAP binding                | Normal                    | Poirier et al., 2007          |
|                  | A270T           | Tubulin folding            | complete ACC              | Kumar et al., 2010            |
|                  | L286F           | Lateral interaction        | complete ACC              | Fallet-Bianco et al., 2008    |
|                  | V303G           | Tubulin folding            | partial ACC               | Lecourtois et al. 2010        |
|                  | R320H           | Tubulin folding            | partial ACC               | Bahi-Buisson et al., 2014     |
|                  | K326N           | Longitudinal interaction   | complete ACC              | Bahi-Buisson et al., 2014     |
|                  | N329S           | Longitudinal interaction   | complete ACC              | Kumar et al., 2010            |
|                  | A333V           | Longitudinal interaction   | hypoplastic CC            | Cushion et al., 2013          |
|                  | V353I           | Longitudinal interaction   | partial ACC               | Bahi-Buisson et al., 2014     |
|                  | G366R           | Lumen-facing loop          | partial ACC               | Okumura et al. 2013           |
|                  | A369T           | Lumen-facing loop          | hypoplastic CC            | Bahi-Buisson et al., 2014     |
|                  | V371E           | Lumen-facing loop          | complete ACC              | Bahi-Buisson et al., 2014     |
|                  | M377V           | Tubulin folding            | partial ACC               | Kumar et al., 2010            |
|                  | A387V           | MAP binding                | hypoplastic CC            | Romaniello et al., 2012       |
|                  | R390C           | MAP binding                | complete ACC              | Kumar et al., 2010            |
|                  | R390H           | MAP binding                | partial ACC               | Zanni et al. 2013             |
|                  | D396Y           | MAP binding                | partial ACC               | Bahi-Buisson et al., 2014     |
|                  | L397P           | MAP binding                | partial ACC               | Bahi-Buisson et al., 2008     |
|                  | R402L           | MAP binding                | mild hypoplastic CC       | Sohal et al., 2012            |
|                  | R402C           | MAP binding                | normal                    | Kumar et al., 2010            |
|                  | R402H           | MAP binding                | normal                    | Kumar et al., 2010            |
|                  | V409A           | MAP binding                | complete ACC              | Bahi-Buisson et al., 2014     |
| V409I            | MAP binding     | hypoplastic CC             | Bahi-Buisson et al., 2014 |                               |
| S419L            | MAP binding     | partial ACC                | Poirier et al., 2007      |                               |
| R422H            | MAP binding     | partial ACC                | Kumar et al., 2010        |                               |

|        |             |                          |                         |                           |                           |
|--------|-------------|--------------------------|-------------------------|---------------------------|---------------------------|
|        | R422C       | MAP binding              | hypoplastic CC          | Bahi-Buisson et al., 2008 |                           |
|        | M425K       | MAP binding              | complete ACC            | Kumar et al., 2010        |                           |
|        | E429Q       | MAP binding              | complete ACC            | Bahi-Buisson et al., 2014 |                           |
|        | G436R       | MAP binding              | hypoplastic CC          | Bahi-Buisson et al., 2008 |                           |
| TUBB2B | G13A        | Tubulin folding          | normal                  | Oegema et al., 2015       |                           |
|        | G98R        | GTP binding              | complete ACC            | Cushion et al., 2013      |                           |
|        | L117P       | Tubulin folding          | normal                  | Guerrini et al., 2012     |                           |
|        | G140A       | GTP binding              | complete ACC            | Romaniello et al., 2012   |                           |
|        | P171T       | GTP binding              | partial ACC             | Bahi-Buisson et al., 2014 |                           |
|        | S172P       | GTP binding              | complete ACC            | Jaglin et al., 2009       |                           |
|        | P173L       | GTP binding              | complete ACC            | Bahi-Buisson et al., 2014 |                           |
|        | I202T       | Tubulin folding          | partial ACC             | Bahi-Buisson et al., 2014 |                           |
|        | L207P       | Tubulin folding          | complete ACC            | Cushion et al., 2013      |                           |
|        | I210T       | Tubulin folding          | partial ACC             | Jaglin et al., 2009       |                           |
|        | L228P       | Tubulin folding          | complete ACC            | Jaglin et al., 2009       |                           |
|        | C239F       | Intradimer interaction   | complete ACC            | Bahi-Buisson et al., 2014 |                           |
|        | R241H       | Intradimer interaction   | normal                  | Bahi-Buisson et al., 2014 |                           |
|        | A248T       | Intradimer interaction   | normal                  | Bahi-Buisson et al., 2014 |                           |
|        | D249H       | Intradimer interaction   | complete ACC            | Bahi-Buisson et al., 2014 |                           |
|        | N256S       | Intradimer interaction   | hypoplastic CC          | Guerrini et al., 2012     |                           |
|        | F265L       | Tubulin folding          | partial ACC             | Jaglin et al., 2009       |                           |
|        | S278G       | Lateral interaction      | partial ACC             | Bahi-Buisson et al., 2014 |                           |
|        | T312M       | Tubulin folding          | hypoplastic CC          | Jaglin et al., 2009       |                           |
|        | G369V       | Lumen-facing loop        | partial ACC             | Bahi-Buisson et al., 2014 |                           |
|        | R380S       | MAP binding              | complete ACC            | Cushion et al., 2013      |                           |
|        | R380C       | MAP binding              | complete ACC            | Cushion et al., 2013      |                           |
|        | R380L       | MAP binding              | complete ACC            | Amrom et al., 2014        |                           |
|        | D417N       | MAP binding              | normal                  | Guerrini et al., 2012     |                           |
|        | TUBB3       | R46G                     | Intradimer interaction  | hypoplastic CC            | Bahi-Buisson et al., 2014 |
|        |             | R62Q                     | Tubulin folding         | normal                    | Tischfield et al., 2010   |
| G71R   |             | Tubulin folding          | partial ACC             | Whitman et al., 2016      |                           |
| G82R   |             | Tubulin folding          | partial ACC             | Poirier et al., 2010      |                           |
| G98S   |             | Longitudinal interaction | hypoplastic CC          | Whitman et al., 2016      |                           |
| T178M  |             | GTP binding              | complete ACC            | Poirier et al., 2010      |                           |
| E205K  |             | Tubulin folding          | hypoplastic CC          | Poirier et al., 2010      |                           |
| R262C  |             | MAP binding              | partial ACC             | Tischfield et al., 2010   |                           |
| R262H  |             | MAP binding              | partial ACC             | Tischfield et al., 2010   |                           |
| E288K  |             | Lateral interaction      | hypoplastic CC          | Oegema et al., 2015       |                           |
| A302T  |             | MAP binding              | partial ACC             | Tischfield et al., 2010   |                           |
| A302V  |             | MAP binding              | hypoplastic CC          | Poirier et al., 2010      |                           |
| M323V  |             | Intradimer interaction   | partial ACC             | Poirier et al., 2010      |                           |
| P357L  |             | Tubulin folding          | normal                  | Oegema et al., 2015       |                           |
| R380C  |             | MAP binding              | partial ACC             | Tischfield et al., 2010   |                           |
| M388V  |             | MAP binding              | complete ACC            | Poirier et al., 2010      |                           |
| E410K  |             | MAP binding              | partial ACC             | Tischfield et al., 2010   |                           |
| D417N  |             | MAP binding              | partial ACC             | Tischfield et al., 2010   |                           |
| D417H  | MAP binding | N/A                      | Tischfield et al., 2010 |                           |                           |

Table S4. Missense mutations in human  $\alpha$  and  $\beta$  tubulins that caused neurological disorders in heterozygous patients. 51 TUBA1A, 24 TUBB2B, and 19 TUBB3B mutations are listed. The mutated amino acids were mapped to the structural domains of  $\alpha/\beta$  heterodimer and their potential structural functions were assigned according to Tischfield *et al.* (2011). Residues located in the interior of the structure were generally assigned to the category of “tubulin folding.” Effects on the corpus callosum (CC) were used as an indicator of defects in axon growth and guidance. These phenotypes were extracted from the cited literature. ACC stands for agenesis of the corpus callosum.

## Supplemental Figures

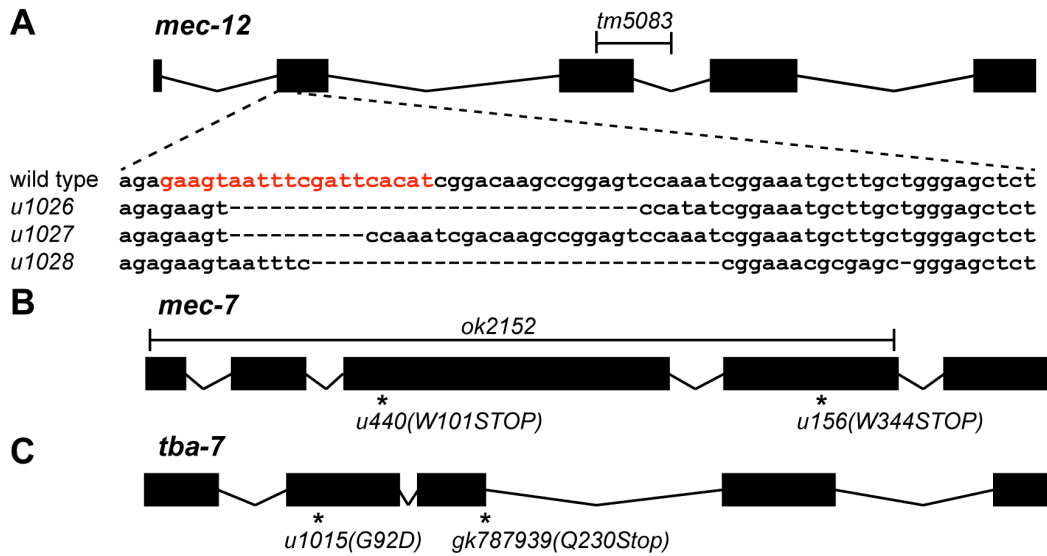

Figure S1. Gene structures for *mec-12*, *mec-7*, and *tba-7* and the molecular lesions in various putative null alleles. *u1026*, *u1027*, and *u1028* were created using CRISPR/Cas9-mediated genome editing and guide RNAs designed to target exon 2 of *mec-12*. Frameshift-causing deletions were identified by genotyping. The *tm5083* mutation deletes part of exon 3 and intron 3 of *mec-12* and also causes a frameshift.

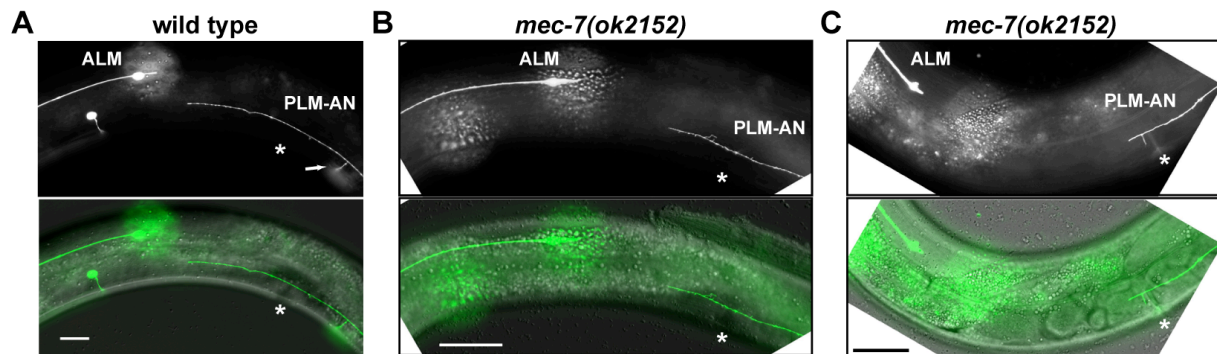

Figure S2. The loss of MEC-7 causes PLM-AN branching defects. (A) In the wild-type animals, PLM-AN extends beyond the vulva (asterisk) and sends out a synaptic branch at a position posterior to the vulva; the branch extends to reach the ventral nerve cord. (B-C) PLM-AN is slightly shorter in *mec-7(ok2152lf)* animals, although it still extends beyond the vulva (triangle). However, PLM-AN fails to form a synaptic branch (B) or could not fully extend the branch at the correct position (C).

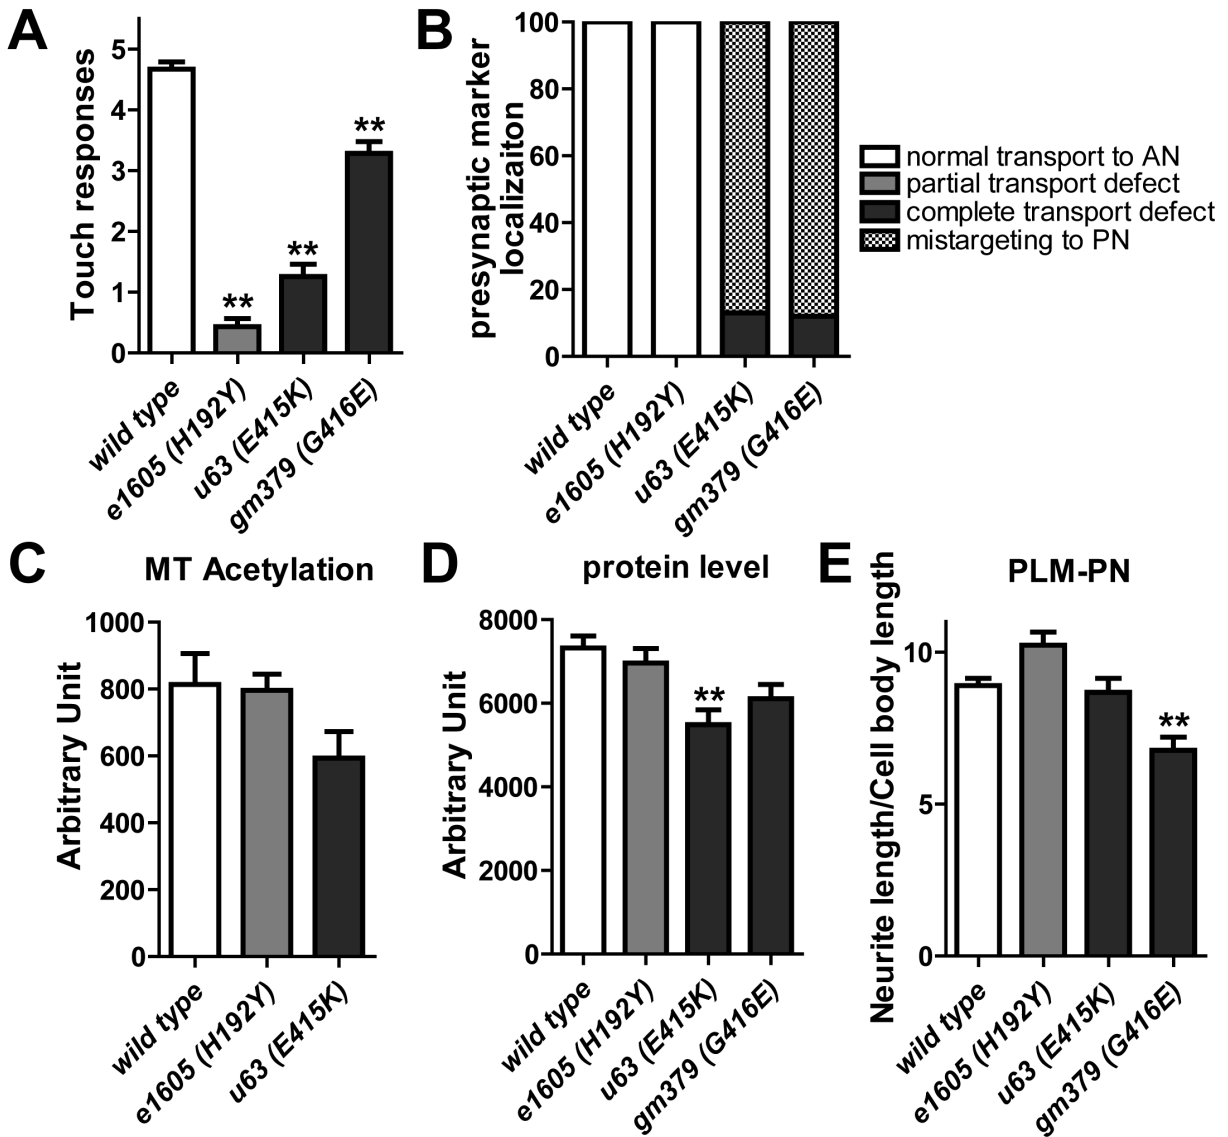

Figure S3. *mec-12* alleles that specifically affect touch sensitivity or synaptic vesicle transport. (A) Anterior touch response (out of five stimuli) of the *mec-12* alleles. (B) Percentage of PLM cells showing transport defects or mistargeting of the presynaptic marker RAB-3::GFP. (C) Immunofluorescent intensity of staining using anti-acetylated  $\alpha$ -tubulin antibodies. (D) Fluorescent intensity of RFP expressed from the transgene *uls134[mec-17p::RFP]* crossed into the *mec-12* mutants. Arbitrary units were used in C and D. (E) The length of the PLM-PN in some *mec-12* mutants. Asterisks indicate significant differences ( $p < 0.01$ ) from the wild type animals.



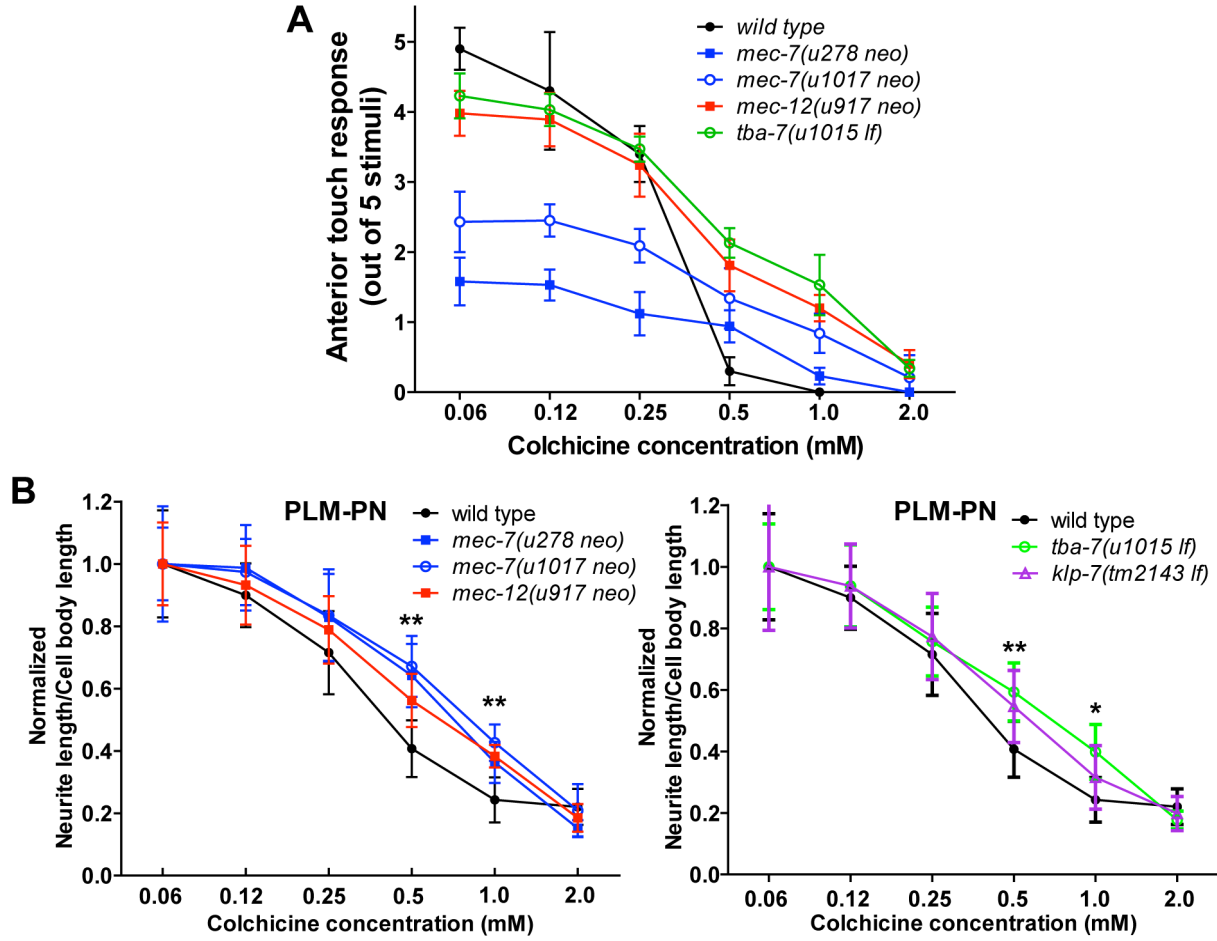

Figure S4. *mec-7(neo)* and *mec-12(neo)*, *tba-7(lf)*, and *klp-7(lf)* mutants have increased resistance to colchicine. (A) Anterior touch response of adult animals grown on plate containing different concentrations of colchicine from the first larval (L1) stage. (B) The normalized length of PLM-PN of adults grown on plates with colchicine from the L1 stage. PLM-PN lengths of animals treated with 0.06 mM colchicine (9.0 for wild type, 13.3 for *u278*, 10.0 for *u1017*, 10.1 for *u917*, 11.0 for *u1015*, and 10.5 for *tm2143*) were used to set as the reference for the normalization. Asterisks indicate the differences among the means were statistically significant in ANOVA tests (one asterisk indicates  $p < 0.05$  and two for  $p < 0.01$ ).



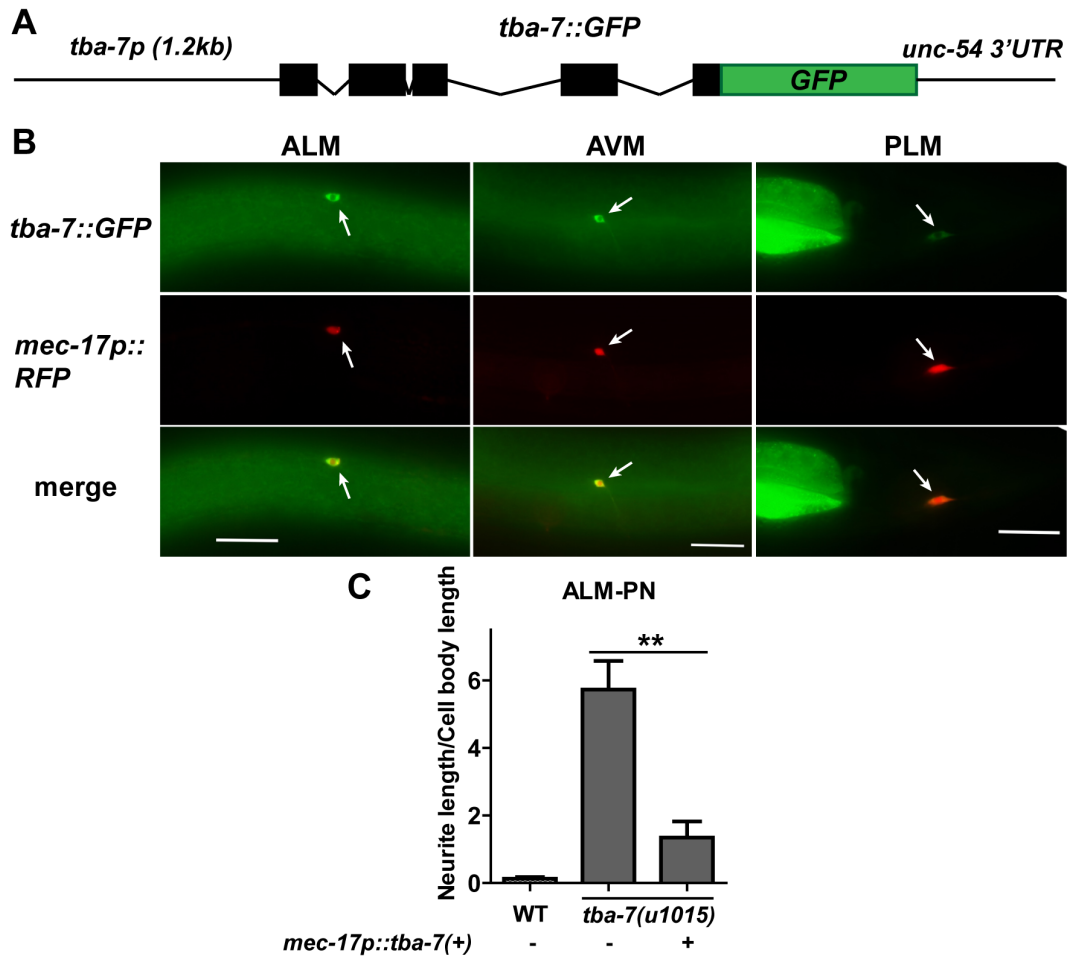

Figure S6. TBA-7 is expressed and acts cell-autonomously in the TRNs. (A) A schematic representation of the *tba-7::GFP* reporter, containing a 1.2 kb promoter and the entire coding region. (B) The expression of *tba-7::GFP* in the TRNs, which are also labeled by *mec-17p::RFP*. Arrows point to the cell bodies of TRNs. The posterior intestine also showed strong GFP signal (the rightmost panel). (C) The length of ALM-PN in *tba-7(u1015 lf)* mutants that carried a rescuing array that expressed wild-type *tba-7* in the TRNs specifically.

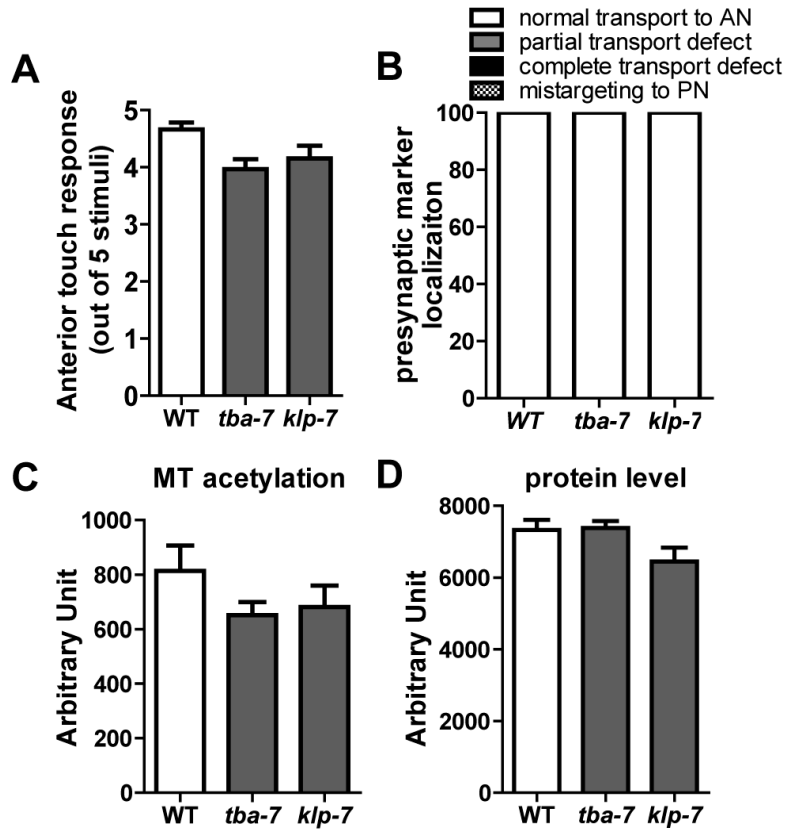

Figure S7. Touch sensitivity, presynaptic vesicle localization, tubulin acetylation level, and protein expression level of *tba-7(u1015 lf)* and *klp-7(tm2143 lf)* mutants. No significant differences between these mutants and wild type were found.

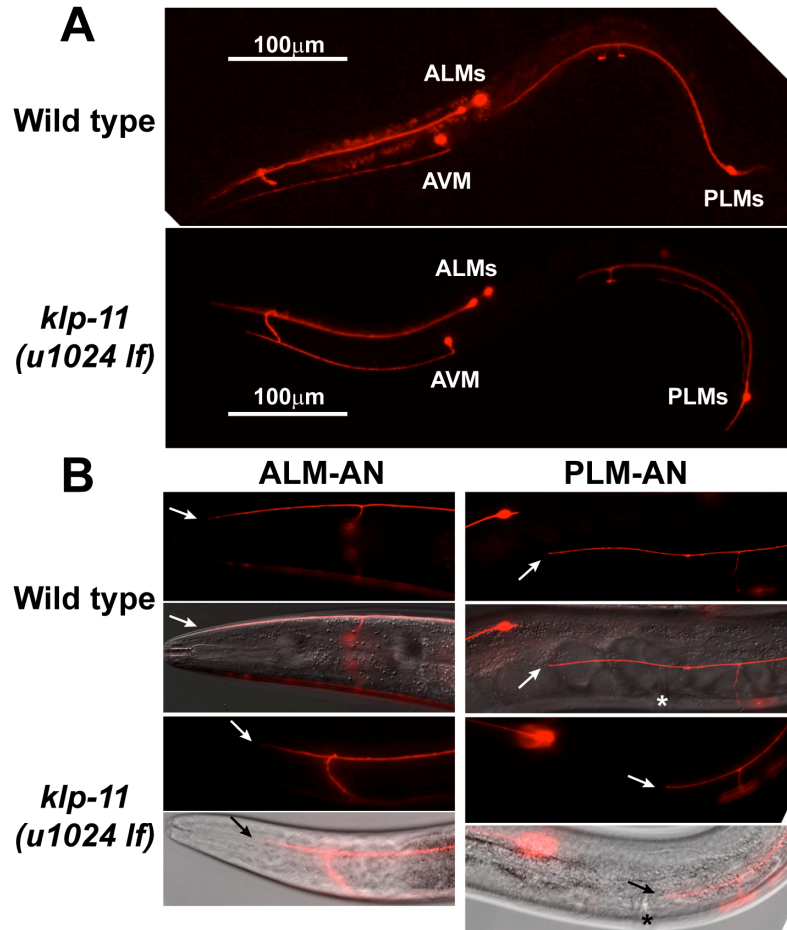

Figure S8. Moderate shortening of ALM-AN and PLM-AN in *klp-11*[*u1024* (Q53\*) *lf*] mutants. In (B), arrows point to the ends of the anterior neurites, and triangles indicate the position of the vulva. ALM-AN did not extend as far as the procorpus of the pharynx and PLM-AN failed to reach the vulva in *klp-11* mutants.



## References

- Amrom D, Tanyalcin I, Verhelst H, Deconinck N, Brouhard GJ, Decarie JC, Vanderhasselt T, Das S, Hamdan FF, Lissens W et al. 2014. Polymicrogyria with dysmorphic basal ganglia? Think tubulin! *Clin Genet* **85**: 178-183.
- Bahi-Buisson N, Poirier K, Boddaert N, Saillour Y, Castelnau L, Philip N, Buyse G, Villard L, Joriot S, Marret S et al. 2008. Refinement of cortical dysgeneses spectrum associated with TUBA1A mutations. *J Med Genet* **45**: 647-653.
- Bahi-Buisson N, Poirier K, Fourniol F, Saillour Y, Valence S, Lebrun N, Hully M, Bianco CF, Boddaert N, Elie C et al. 2014. The wide spectrum of tubulinopathies: what are the key features for the diagnosis? *Brain* **137**: 1676-1700.
- Cushion TD, Dobyns WB, Mullins JG, Stoodley N, Chung SK, Fry AE, Hehr U, Gunny R, Aylsworth AS, Prabhakar P et al. 2013. Overlapping cortical malformations and mutations in TUBB2B and TUBA1A. *Brain* **136**: 536-548.
- Driscoll M, Chalfie M. 1991. The mec-4 gene is a member of a family of Caenorhabditis elegans genes that can mutate to induce neuronal degeneration. *Nature* **349**: 588-593.
- Du H, Chalfie M. 2001. Genes regulating touch cell development in Caenorhabditis elegans. *Genetics* **158**: 197-207.
- Fallet-Bianco C, Loeuillet L, Poirier K, Loget P, Chapon F, Pasquier L, Saillour Y, Beldjord C, Chelly J, Francis F. 2008. Neuropathological phenotype of a distinct form of lissencephaly associated with mutations in TUBA1A. *Brain* **131**: 2304-2320.
- Feng G, Yi P, Yang Y, Chai Y, Tian D, Zhu Z, Liu J, Zhou F, Cheng Z, Wang X et al. 2013. Developmental stage-dependent transcriptional regulatory pathways control neuroblast lineage progression. *Development* **140**: 3838-3847.
- Guerrini R, Mei D, Cordelli DM, Pucatti D, Franzoni E, Parrini E. 2012. Symmetric polymicrogyria and pachygyria associated with TUBB2B gene mutations. *Eur J Hum Genet* **20**: 995-998.
- Harris J, Honigberg L, Robinson N, Kenyon C. 1996. Neuronal cell migration in C. elegans: regulation of Hox gene expression and cell position. *Development* **122**: 3117-3131.
- Hedgecock EM, Culotti JG, Hall DH. 1990. The unc-5, unc-6, and unc-40 genes guide circumferential migrations of pioneer axons and mesodermal cells on the epidermis in C. elegans. *Neuron* **4**: 61-85.
- Hekimi S, Kershaw D. 1993. Axonal guidance defects in a Caenorhabditis elegans mutant reveal cell-extrinsic determinants of neuronal morphology. *The Journal of neuroscience : the official journal of the Society for Neuroscience* **13**: 4254-4271.
- Hilliard MA, Bargmann CI. 2006. Wnt signals and frizzled activity orient anterior-posterior axon outgrowth in C. elegans. *Developmental cell* **10**: 379-390.
- Jaglin XH, Poirier K, Saillour Y, Buhler E, Tian G, Bahi-Buisson N, Fallet-Bianco C, Phan-Dinh-Tuy F, Kong XP, Bomont P et al. 2009. Mutations in the beta-tubulin gene TUBB2B result in asymmetrical polymicrogyria. *Nat Genet* **41**: 746-752.
- Jansen AC, Oostra A, Desprechins B, De Vlaeminck Y, Verhelst H, Regal L, Verloo P, Bockaert N, Keymolen K, Seneca S et al. 2011. TUBA1A mutations: from isolated lissencephaly to familial polymicrogyria. *Neurology* **76**: 988-992.
- Jia Y, Xie G, Aamodt E. 1996. pag-3, a Caenorhabditis elegans gene involved in touch neuron gene expression and coordinated movement. *Genetics* **142**: 141-147.
- Kumar RA, Pilz DT, Babatz TD, Cushion TD, Harvey K, Topf M, Yates L, Robb S, Uyanik G, Mancini GM et al. 2010. TUBA1A mutations cause wide spectrum lissencephaly (smooth brain) and suggest that multiple neuronal migration pathways converge on alpha tubulins. *Hum Mol Genet* **19**: 2817-2827.

- Lecourtois M, Poirier K, Friocourt G, Jaglin X, Goldenberg A, Saugier-veber P, Chelly J, Laquerriere A. 2010. Human lissencephaly with cerebellar hypoplasia due to mutations in TUBA1A: expansion of the foetal neuropathological phenotype. *Acta Neuropathol* **119**: 779-789.
- Mitani S, Du H, Hall DH, Driscoll M, Chalfie M. 1993. Combinatorial control of touch receptor neuron expression in *Caenorhabditis elegans*. *Development* **119**: 773-783.
- Morris-Rosendahl DJ, Najm J, Lachmeijer AM, Sztriha L, Martins M, Kuechler A, Haug V, Zeschnigk C, Martin P, Santos M et al. 2008. Refining the phenotype of alpha-1a Tubulin (TUBA1A) mutation in patients with classical lissencephaly. *Clin Genet* **74**: 425-433.
- Nogales E, Wolf SG, Downing KH. 1998. Structure of the alpha beta tubulin dimer by electron crystallography. *Nature* **391**: 199-203.
- Oegema R, Cushion TD, Phelps IG, Chung SK, Dempsey JC, Collins S, Mullins JG, Dudding T, Gill H, Green AJ et al. 2015. Recognizable cerebellar dysplasia associated with mutations in multiple tubulin genes. *Hum Mol Genet* **24**: 5313-5325.
- Okumura A, Hayashi M, Tsurui H, Yamakawa Y, Abe S, Kudo T, Suzuki R, Shimizu T, Shimojima K, Yamamoto T. 2013. Lissencephaly with marked ventricular dilation, agenesis of corpus callosum, and cerebellar hypoplasia caused by TUBA1A mutation. *Brain Dev* **35**: 274-279.
- Poirier K, Keays DA, Francis F, Saillour Y, Bahi N, Manouvrier S, Fallet-Bianco C, Pasquier L, Toutain A, Tuy FP et al. 2007. Large spectrum of lissencephaly and pachygyria phenotypes resulting from de novo missense mutations in tubulin alpha 1A (TUBA1A). *Hum Mutat* **28**: 1055-1064.
- Poirier K, Saillour Y, Bahi-Buisson N, Jaglin XH, Fallet-Bianco C, Nabbout R, Castelnau-Ptakhine L, Roubertie A, Attie-Bitach T, Desguerre I et al. 2010. Mutations in the neuronal ss-tubulin subunit TUBB3 result in malformation of cortical development and neuronal migration defects. *Hum Mol Genet* **19**: 4462-4473.
- Poirier K, Saillour Y, Fourniol F, Francis F, Souville I, Valence S, Desguerre I, Marie Lepage J, Boddaert N, Line Jacquemont M et al. 2013. Expanding the spectrum of TUBA1A-related cortical dysgenesis to Polymicrogyria. *Eur J Hum Genet* **21**: 381-385.
- Romaniello R, Tonelli A, Arrigoni F, Baschiroto C, Triulzi F, Bresolin N, Bassi MT, Borgatti R. 2012. A novel mutation in the beta-tubulin gene TUBB2B associated with complex malformation of cortical development and deficits in axonal guidance. *Dev Med Child Neurol* **54**: 765-769.
- Sohal AP, Montgomery T, Mitra D, Ramesh V. 2012. TUBA1A mutation-associated lissencephaly: case report and review of the literature. *Pediatr Neurol* **46**: 127-131.
- Tischfield MA, Baris HN, Wu C, Rudolph G, Van Maldergem L, He W, Chan WM, Andrews C, Demer JL, Robertson RL et al. 2010. Human TUBB3 mutations perturb microtubule dynamics, kinesin interactions, and axon guidance. *Cell* **140**: 74-87.
- Tischfield MA, Cederquist GY, Gupta ML, Jr., Engle EC. 2011. Phenotypic spectrum of the tubulin-related disorders and functional implications of disease-causing mutations. *Curr Opin Genet Dev* **21**: 286-294.
- Whitman MC, Andrews C, Chan WM, Tischfield MA, Stasheff SF, Brancati F, Ortiz-Gonzalez X, Nuovo S, Garaci F, MacKinnon SE et al. 2016. Two unique TUBB3 mutations cause both CFEOM3 and malformations of cortical development. *Am J Med Genet A* **170A**: 297-305.
- Wu J, Duggan A, Chalfie M. 2001. Inhibition of touch cell fate by egl-44 and egl-46 in *C. elegans*. *Genes & development* **15**: 789-802.
- Zanni G, Colafati GS, Barresi S, Randisi F, Talamanca LF, Genovese E, Bellacchio E, Bartuli A, Bernardi B, Bertini E. 2013. Description of a novel TUBA1A mutation in Arg-390 associated with asymmetrical polymicrogyria and mid-hindbrain dysgenesis. *Eur J Paediatr Neurol* **17**: 361-365.
- Zheng C, Diaz-Cuadros M, Chalfie M. 2015a. Dishevelled attenuates the repelling activity of Wnt signaling during neurite outgrowth in *Caenorhabditis elegans*. *Proceedings of the National Academy of Sciences of the United States of America* **112**: 13243-13248.



- 2015b. Hox Genes Promote Neuronal Subtype Diversification through Posterior Induction in *Caenorhabditis elegans*. *Neuron* **88**: 514-527.
- 2016. GEFs and Rac GTPases control directional specificity of neurite extension along the anterior-posterior axis. *Proceedings of the National Academy of Sciences of the United States of America* **113**: 6973-6978.
